# Supplementary material for: A randomized controlled trial investigating the impact of maternal dietary supplementation with pomegranate juice on brain injury in infants with IUGR
Source: PubMed Central journal article supplement (PMC7878922; doi:10.1038/s41598-021-82144-0), 2021-02-11
Supplement: 41598_2021_82144_MOESM1_ESM.pdf [file 41598_2021_82144_MOESM1_ESM.pdf]

**A randomized controlled trial investigating the impact of maternal dietary supplementation with pomegranate juice on brain injury in infants with IUGR**

Madeline M ROSS<sup>1</sup>, Sara CHERKERZIAN, ScD<sup>1</sup>, Nicole D MIKULIS<sup>1</sup>, Daria TURNER<sup>1</sup>,  
Julian ROBINSON, MD<sup>2</sup>, Terrie E INDER, MBChB, MD<sup>1</sup>, Lillian G MATTHEWS, PhD<sup>1,3,4\*</sup>

<sup>1</sup>Department of Pediatric Newborn Medicine, Brigham and Women's Hospital, Harvard Medical School, Boston, Massachusetts

<sup>2</sup>Department of Obstetrics, Brigham and Women's Hospital, Harvard Medical School, Boston, Massachusetts

<sup>3</sup>Turner Institute for Brain and Mental Health, Monash University, Melbourne, Australia

<sup>4</sup>Monash Biomedical Imaging, Monash University, Melbourne, Australia

*\*Corresponding Author*

## **Supplementary Information**

**S1 Table.** Brain volumes by study arm.

**S2 Table.** DTI measures by study arm.

**S3 Table.** Continuous brain injury measures by study arm.

**S4 Table.** Brain injury scores by study arm – modified intent-to-treat (mITT) analysis.

**S5 Table.** Brain injury scores by study arm – per protocol (PP) analysis.

**S6 Table.** Brain injury scores by study arm – per protocol (PP) analysis, excluding infants born to mothers who were metabolite positive at enrollment.

**S7 Table.** Brain injury and study arm, stratified by obesity status for infants with increased extra-axial space in modified intent-to-treat (mITT) analysis, and dilated ventricles in per protocol (PP) analysis

**S1 Table.** Brain volumes by study arm

| <b>Group Comparisons</b> |                                                                   |           |          |                |                                                                                      |           |          |                |
|--------------------------|-------------------------------------------------------------------|-----------|----------|----------------|--------------------------------------------------------------------------------------|-----------|----------|----------------|
|                          | <b>MODIFIED INTENTION-TO-TREAT<br/>(Placebo, n=27; POM, n=24)</b> |           |          |                | <b>PER-PROTOCOL<br/>(Placebo Metabolite -ve, n=16; POM<br/>Metabolite +ve, n=15)</b> |           |          |                |
|                          | <b>Estimate (95% CI)</b>                                          | <b>SE</b> | <b>z</b> | <b>P-value</b> | <b>Estimate (95% CI)</b>                                                             | <b>SE</b> | <b>z</b> | <b>P-value</b> |
| GM                       | 5.46 (-8.26, 19.19)                                               | 7.00      | 0.78     | 0.435          | 4.36 (-17.31, 26.03)                                                                 | 11.06     | 0.39     | 0.693          |
| WM                       | -6.62 (-14.35, 1.10)                                              | 3.94      | -1.68    | 0.093          | 3.49 (-14.30, 21.29)                                                                 | 9.08      | 0.38     | 0.700          |
| CSF                      | -2.14 (-16.22, 11.93)                                             | 7.18      | -0.30    | 0.765          | -8.02 (-27.34, 11.30)                                                                | 9.86      | -0.81    | 0.416          |
| DGM                      | 0.19 (-1.61, 1.99)                                                | 0.92      | 0.21     | 0.837          | 0.45 (-0.91, 1.81)                                                                   | 0.69      | 0.65     | 0.515          |
| Hippocampus              | 0.09 (-0.83, 1.00)                                                | 0.47      | 0.18     | 0.854          | -0.01 (-0.77, 0.76)                                                                  | 0.39      | -0.01    | 0.988          |
| Amygdala                 | 0.26 (-0.10, 0.63)                                                | 0.19      | 1.41     | 0.160          | -0.08 (-0.44, 0.28)                                                                  | 0.18      | -0.45    | 0.654          |
| Cerebellum               | -0.71 (-3.49, 2.07)                                               | 1.42      | -0.50    | 0.617          | -0.82 (-3.85, 2.21)                                                                  | 1.55      | -0.53    | 0.596          |
| Brainstem                | 0.00 (-0.78, 0.78)                                                | 0.40      | 0.00     | 0.999          | -0.48 (-2.36, 1.40)                                                                  | 0.96      | -0.50    | 0.615          |
| Total tissue             | -9.87 (-34.56, 14.83)                                             | 12.60     | -0.78    | 0.434          | 8.21 (-17.99, 34.41)                                                                 | 13.37     | 0.61     | 0.539          |
| ICV                      | -17.68 (-50.84, 15.48)                                            | 16.92     | -1.05    | 0.296          | -15.87 (-76.97, 45.22)                                                               | 31.17     | -0.51    | 0.611          |
| <i>Adjusted for ICV</i>  |                                                                   |           |          |                |                                                                                      |           |          |                |
| GM                       | 5.01 (-5.31, 15.33)                                               | 5.26      | 0.95     | 0.342          | 6.42 (-13.24, 26.07)                                                                 | 10.03     | 0.64     | 0.522          |
| WM                       | -3.30 (-9.90, 3.30)                                               | 3.37      | -0.98    | 0.327          | -2.44 (-14.90, 10.01)                                                                | 6.36      | -0.38    | 0.701          |
| CSF                      | -1.17 (-11.01, 8.67)                                              | 5.02      | -0.23    | 0.816          | -5.04 (-18.05, 7.96)                                                                 | 6.63      | -0.76    | 0.447          |
| DGM                      | 0.18 (-1.42, 1.78)                                                | 0.82      | 0.22     | 0.823          | 0.49 (-0.84, 1.82)                                                                   | 0.68      | 0.72     | 0.473          |
| Hippocampus              | 0.05 (-0.81, 0.91)                                                | 0.44      | 0.12     | 0.903          | -0.11 (-0.79, 0.58)                                                                  | 0.35      | -0.30    | 0.762          |
| Amygdala                 | 0.15 (-0.32, 0.62)                                                | 0.24      | 0.61     | 0.542          | -0.09 (-0.41, 0.24)                                                                  | 0.17      | -0.52    | 0.607          |
| Cerebellum               | -1.01 (-4.00, 1.97)                                               | 1.52      | -0.67    | 0.505          | -0.27 (-3.57, 3.04)                                                                  | 1.69      | -0.16    | 0.875          |
| Brainstem                | 0.00 (-1.10, 1.11)                                                | 0.56      | 0.00     | 0.998          | 0.03 (-1.51, 1.58)                                                                   | 0.79      | 0.04     | 0.968          |
| Total tissue             | 1.17 (-8.67, 11.01)                                               | 5.02      | 0.23     | 0.816          | 5.04 (-7.96, 18.05)                                                                  | 6.63      | 0.76     | 0.447          |

Group comparisons evaluated using median regression adjusted for intrafamilial correlation among twins, as well as for potential confounding by maternal BMI at enrollment, PMA at MRI scan, infant sex and SGA status (placebo = reference).

GM – cortical grey matter; CSF – cerebrospinal fluid; DGM – deep grey matter; ICV – intracranial volume; POM – pomegranate; WM – white matter

**S2 Table.** DTI measures by study arm

| <b>Group Comparisons</b> |    |                                                                                 |           |                 |                            |                                                                                                   |           |                 |                            |
|--------------------------|----|---------------------------------------------------------------------------------|-----------|-----------------|----------------------------|---------------------------------------------------------------------------------------------------|-----------|-----------------|----------------------------|
| <b>Tract</b>             |    | <b>MODIFIED INTENTION-TO-TREAT<br/>(Placebo, <i>n</i>=19; POM, <i>n</i>=18)</b> |           |                 |                            | <b>PER-PROTOCOL<br/>(Placebo Metabolite -ve, <i>n</i>=8; POM<br/>Metabolite +ve, <i>n</i>=11)</b> |           |                 |                            |
|                          |    | <b>Estimate (95%<br/>CI)</b>                                                    | <b>SE</b> | <b><i>z</i></b> | <b><i>P</i>-<br/>value</b> | <b>Estimate (95%<br/>CI)</b>                                                                      | <b>SE</b> | <b><i>z</i></b> | <b><i>P</i>-<br/>value</b> |
| <i>L ALIC</i>            | FA | -0.01 (-0.05, 0.04)                                                             | 0.02      | -0.37           | 0.711                      | 0.05 (-0.01, 0.10)                                                                                | 0.03      | 1.76            | 0.079                      |
|                          | MD | -0.09 (-0.39, 0.21)                                                             | 0.15      | -0.58           | 0.565                      | 0.66 (-0.62, 1.94)                                                                                | 0.66      | 1.01            | 0.314                      |
|                          | AD | 0.19 (-1.04, 1.41)                                                              | 0.63      | 0.30            | 0.763                      | 1.17 (-0.93, 3.26)                                                                                | 1.07      | 1.09            | 0.276                      |
|                          | RD | 0.18 (-0.23, 0.58)                                                              | 0.21      | 0.84            | 0.399                      | 0.38 (-0.58, 1.33)                                                                                | 0.49      | 0.77            | 0.442                      |
| <i>R ALIC</i>            | FA | -0.02 (-0.08, 0.04)                                                             | 0.03      | -0.65           | 0.515                      | 0.03 (-0.02, 0.08)                                                                                | 0.03      | 1.27            | 0.203                      |
|                          | MD | 0.13 (-0.25, 0.51)                                                              | 0.20      | 0.66            | 0.507                      | -0.24 (-0.49, 0.00)                                                                               | 0.12      | -1.97           | 0.049 <sup>1</sup>         |
|                          | AD | 0.00 (-1.11, 1.10)                                                              | 0.56      | 0.00            | 0.999                      | 0.17 (-1.42, 1.76)                                                                                | 0.81      | 0.21            | 0.833                      |
|                          | RD | 0.19 (-0.32, 0.71)                                                              | 0.26      | 0.74            | 0.461                      | -0.38 (-1.45, 0.69)                                                                               | 0.55      | -0.70           | 0.485                      |
| <i>L PLIC</i>            | FA | -0.02 (-0.07, 0.03)                                                             | 0.03      | -0.67           | 0.504                      | 0.04 (-0.03, 0.11)                                                                                | 0.04      | 1.01            | 0.315                      |
|                          | MD | 0.17 (-0.27, 0.60)                                                              | 0.22      | 0.76            | 0.444                      | -0.25 (-1.66, 1.15)                                                                               | 0.72      | -0.35           | 0.725                      |
|                          | AD | -0.20 (-1.10, 0.70)                                                             | 0.46      | -0.44           | 0.661                      | 0.61 (-0.63, 1.85)                                                                                | 0.63      | 0.96            | 0.336                      |
|                          | RD | 0.15 (-0.45, 0.75)                                                              | 0.31      | 0.48            | 0.632                      | -0.44 (-1.52, 0.63)                                                                               | 0.55      | -0.81           | 0.419                      |
| <i>R PLIC</i>            | FA | -0.02 (-0.07, 0.02)                                                             | 0.02      | -1.00           | 0.319                      | 0.03 (-0.07, 0.14)                                                                                | 0.06      | 0.62            | 0.537                      |
|                          | MD | 0.17 (-0.19, 0.52)                                                              | 0.18      | 0.91            | 0.364                      | -0.24 (-1.24, 0.76)                                                                               | 0.51      | -0.47           | 0.636                      |
|                          | AD | -0.20 (-1.09, 0.68)                                                             | 0.45      | -0.45           | 0.652                      | 0.99 (-2.78, 4.75)                                                                                | 1.92      | 0.51            | 0.607                      |
|                          | RD | 0.49 (-0.16, 1.14)                                                              | 0.33      | 1.48            | 0.138                      | -0.34 (-1.51, 0.92)                                                                               | 0.60      | -0.57           | 0.566                      |
| <i>L OR</i>              | FA | 0.01 (-0.03, 0.05)                                                              | 0.02      | 0.56            | 0.573                      | 0.03 (-0.02, 0.07)                                                                                | 0.02      | 1.16            | 0.247                      |
|                          | MD | 0.11 (-0.78, 1.00)                                                              | 0.45      | 0.24            | 0.812                      | 1.69 (-1.40, 4.78)                                                                                | 1.58      | 1.07            | 0.284                      |
|                          | AD | 0.54 (-0.65, 1.71)                                                              | 0.60      | 0.89            | 0.374                      | 1.29 (-0.28, 2.86)                                                                                | 0.80      | 1.61            | 0.107                      |
|                          | RD | 0.02 (-1.03, 1.07)                                                              | 0.54      | 0.03            | 0.977                      | 0.98 (-1.28, 3.24)                                                                                | 1.15      | 0.85            | 0.395                      |
| <i>R OR</i>              | FA | -0.02 (-0.08, 0.03)                                                             | 0.03      | -0.85           | 0.396                      | -0.02 (-0.09, 0.05)                                                                               | 0.04      | -0.62           | 0.537                      |
|                          | MD | 0.11 (-0.92, 1.14)                                                              | 0.53      | 0.21            | 0.834                      | 0.59 (-1.07, 2.26)                                                                                | 0.85      | 0.70            | 0.485                      |
|                          | AD | 0.40 (-0.69, 1.50)                                                              | 0.56      | 0.72            | 0.470                      | 0.46 (-0.93, 1.85)                                                                                | 0.71      | 0.65            | 0.515                      |
|                          | RD | 0.30 (-0.76, 1.36)                                                              | 0.54      | 0.56            | 0.576                      | 0.62 (-1.18, 2.41)                                                                                | 0.92      | 0.67            | 0.501                      |
| <i>L Frontal</i>         | FA | 0.00 (-0.04, 0.04)                                                              | 0.02      | 0.14            | 0.891                      | -0.02 (-0.09, 0.05)                                                                               | 0.03      | -0.61           | 0.543                      |
|                          | MD | -0.76 (-1.97, 0.46)                                                             | 0.62      | -1.22           | 0.223                      | 0.14 (-1.97, 2.24)                                                                                | 1.08      | 0.13            | 0.900                      |
|                          | AD | -0.48 (-1.72, 0.75)                                                             | 0.63      | -0.77           | 0.442                      | -0.10 (-2.51, 2.30)                                                                               | 1.23      | -0.08           | 0.932                      |
|                          | RD | -0.98 (-2.60, 0.64)                                                             | 0.83      | -1.19           | 0.234                      | 0.03 (-2.56, 2.62)                                                                                | 1.32      | 0.02            | 0.984                      |

|                    |    |                     |      |       |       |                     |      |       |                    |
|--------------------|----|---------------------|------|-------|-------|---------------------|------|-------|--------------------|
| <i>R Frontal</i>   | FA | 0.02 (0.00, 0.05)   | 0.01 | 1.66  | 0.098 | 0.02 (-0.01, 0.05)  | 0.02 | 1.30  | 0.194              |
|                    | MD | -0.24 (-1.48, 0.99) | 0.63 | -0.39 | 0.699 | -0.43 (-3.33, 2.46) | 1.48 | -0.29 | 0.770              |
|                    | AD | 0.10 (-0.97, 1.17)  | 0.55 | 0.18  | 0.856 | 0.09 (-3.45, 3.63)  | 1.81 | 0.05  | 0.960              |
|                    | RD | -0.32 (-1.73, 1.10) | 0.72 | -0.44 | 0.662 | -0.45 (-3.14, 2.25) | 1.37 | -0.33 | 0.745              |
| <i>L Occipital</i> | FA | -0.01 (-0.04, 0.01) | 0.01 | -1.23 | 0.217 | -0.03 (-0.06, 0.00) | 0.01 | -2.06 | 0.039 <sup>1</sup> |
|                    | MD | -0.29 (-1.56, 0.99) | 0.65 | -0.44 | 0.661 | -1.36 (-4.65, 1.93) | 1.68 | -0.81 | 0.419              |
|                    | AD | -0.48 (-1.68, 0.72) | 0.61 | -0.79 | 0.429 | -2.22 (-5.63, 1.20) | 1.74 | -1.27 | 0.203              |
|                    | RD | -0.26 (-1.27, 0.76) | 0.52 | -0.50 | 0.618 | -1.49 (-4.69, 1.71) | 1.63 | -0.91 | 0.362              |
| <i>R Occipital</i> | FA | -0.01 (-0.03, 0.02) | 0.01 | -0.45 | 0.652 | 0.01 (0.00, 0.02)   | 0.01 | 1.30  | 0.192              |
|                    | MD | 0.28 (-0.30, 0.87)  | 0.30 | 0.95  | 0.340 | 0.04 (-2.98, 3.06)  | 1.54 | 0.03  | 0.980              |
|                    | AD | 0.33 (-1.12, 1.77)  | 0.74 | 0.44  | 0.659 | 0.21 (-2.50, 2.93)  | 1.39 | 0.15  | 0.877              |
|                    | RD | 0.19 (-0.43, 0.80)  | 0.32 | 0.59  | 0.554 | -0.03 (-2.82, 2.75) | 1.42 | -0.02 | 0.981              |

Group comparisons evaluated using median regression adjusted for intrafamilial correlation among twins, as well as for potential confounding by maternal BMI at enrollment, PMA at MRI scan, infant sex and SGA status (placebo = reference).

<sup>1</sup> Did not survive FDR correction for multiple comparisons

AD – axial diffusivity; ALIC – anterior limb of internal capsule; FA – fractional anisotropy; Frontal – frontal lobe; L – left; OR – optic radiation; MD – mean diffusivity; Occipital – occipital lobe; PLIC – posterior limb of internal capsule; POM – pomegranate; R – right; RD – radial diffusivity; MD/AD/RD values are  $\times 10^{-4}$

**S3 Table.** Continuous brain injury measures by study arm

|                        | Group Comparisons                |                  |                  |                              |                  |                  |                                          |      |       |             |                                          |      |       |             |
|------------------------|----------------------------------|------------------|------------------|------------------------------|------------------|------------------|------------------------------------------|------|-------|-------------|------------------------------------------|------|-------|-------------|
|                        | Placebo<br>(n=31)                |                  |                  | POM<br>(n=25)                |                  |                  | MODIFIED INTENTION-TO-TREAT <sup>1</sup> |      |       |             | MODIFIED INTENTION-TO-TREAT <sup>2</sup> |      |       |             |
|                        | 25 <sup>th</sup>                 | 50 <sup>th</sup> | 75 <sup>th</sup> | 25 <sup>th</sup>             | 50 <sup>th</sup> | 75 <sup>th</sup> | Estimate (95%<br>CI)                     | SE   | z     | P-<br>value | Estimate (95%<br>CI)                     | SE   | z     | P-<br>value |
| DGM (cm <sup>2</sup> ) | 11.25                            | 12.10            | 13.20            | 11.50                        | 12.22            | 12.60            | 0.12 (-0.82, 1.06)                       | 0.48 | 0.25  | 0.803       | 0.33 (-0.95, 1.61)                       | 0.65 | 0.51  | 0.612       |
| BPD (mm)               | 78.07                            | 82.01            | 88.83            | 75.80                        | 79.50            | 83.70            | -2.51 (-7.75, 2.73)                      | 2.67 | -0.94 | 0.348       | 1.63 (-4.32, 7.59)                       | 3.04 | 0.54  | 0.591       |
| IHD (mm)               | 1.80                             | 2.56             | 4.00             | 0.97                         | 1.96             | 2.40             | -0.60 (-1.52, 0.32)                      | 0.47 | -1.28 | 0.200       | -0.51 (-1.44, 0.42)                      | 0.47 | -1.08 | 0.280       |
| rLVD (mm)              | 4.57                             | 5.80             | 6.90             | 5.00                         | 5.33             | 6.32             | -0.47 (-1.67, 0.74)                      | 0.61 | -0.76 | 0.447       | 0.71 (-0.83, 2.25)                       | 0.79 | 0.91  | 0.364       |
| lLVD (mm)              | 4.76                             | 5.60             | 7.90             | 5.00                         | 5.70             | 6.94             | 0.10 (-1.23, 1.43)                       | 0.68 | 0.15  | 0.883       | 0.34 (-1.17, 1.85)                       | 0.77 | 0.45  | 0.655       |
| TCD (mm)               | 50.23                            | 53.37            | 56.40            | 49.63                        | 51.50            | 53.40            | -1.87 (-4.62, 0.88)                      | 1.40 | -1.33 | 0.182       | 0.54 (-3.53, 4.61)                       | 2.08 | 0.26  | 0.794       |
|                        | Placebo Metabolite -ve<br>(n=17) |                  |                  | POM Metabolite +ve<br>(n=16) |                  |                  | PER PROTOCOL <sup>1</sup>                |      |       |             | PER PROTOCOL <sup>2</sup>                |      |       |             |
|                        | 25 <sup>th</sup>                 | 50 <sup>th</sup> | 75 <sup>th</sup> | 25 <sup>th</sup>             | 50 <sup>th</sup> | 75 <sup>th</sup> | Estimate (95%<br>CI)                     | SE   | z     | P-<br>value | Estimate (95%<br>CI)                     | SE   | z     | P-<br>value |
| DGM (cm <sup>2</sup> ) | 10.90                            | 12.10            | 13.30            | 11.88                        | 12.40            | 12.85            | 0.30 (-1.04, 1.64)                       | 0.68 | 0.44  | 0.661       | 1.22 (-0.45, 2.88)                       | 0.85 | 1.43  | 0.152       |
| BPD (mm)               | 79.71                            | 83.71            | 88.83            | 74.96                        | 82.69            | 83.68            | -1.21 (-8.45, 6.03)                      | 3.69 | -0.33 | 0.743       | 1.12 (-6.47, 8.71)                       | 3.87 | 0.29  | 0.772       |
| IHD (mm)               | 2.30                             | 2.63             | 4.22             | 0.82                         | 1.55             | 2.54             | -0.93 (-2.22, 0.35)                      | 0.66 | -1.42 | 0.154       | -0.68 (-1.81, 0.45)                      | 0.58 | -1.18 | 0.240       |
| rLVD (mm)              | 4.49                             | 5.22             | 6.90             | 4.60                         | 5.20             | 5.89             | -0.02 (-1.95, 1.91)                      | 0.99 | -0.02 | 0.985       | 1.13 (-0.87, 3.12)                       | 1.01 | 1.10  | 0.269       |
| lLVD (mm)              | 4.76                             | 5.55             | 8.52             | 4.92                         | 5.68             | 6.35             | 0.12 (-1.51, 1.74)                       | 0.83 | 0.14  | 0.890       | -0.90 (-2.90, 1.10)                      | 1.02 | -0.88 | 0.380       |
| TCD (mm)               | 49.63                            | 53.90            | 56.31            | 49.00                        | 52.09            | 54.17            | -1.22 (-5.80, 3.36)                      | 2.34 | -0.52 | 0.602       | 1.73 (-4.31, 7.76)                       | 3.08 | 0.56  | 0.575       |

<sup>1</sup> Group comparisons evaluated using median regression adjusted for intrafamilial correlation among twins (placebo = reference).

<sup>2</sup> Group comparisons evaluated using median regression adjusted for intrafamilial correlation among twins, as well as for potential confounding by maternal BMI at enrollment, PMA at MRI scan, infant sex and SGA status (placebo = reference).

BPD – biparietal diameter; DGM – deep grey matter (total basal ganglia area); IHD – interhemispheric distance; lLVD – left lateral ventricle diameter; rLVD – right lateral ventricle diameter; POM – pomegranate; TCD – transverse cerebellar diameter

**S4 Table.** Brain injury scores by study arm – modified intent-to-treat (mITT) analysis.

|                                                | Score         | Placebo<br>(n=31) |       | POM<br>(n=26) |        |
|------------------------------------------------|---------------|-------------------|-------|---------------|--------|
|                                                |               | n                 | %     | n             | %      |
| <b>WM cystic lesions</b>                       | <b>0</b>      | 31                | 100.0 | 26            | 100.0  |
|                                                | <b>≥ 1</b>    | 0                 | 0.0   | 0             | 0.0    |
| <b>WM focal signal abnormality</b>             | <b>0</b>      | 23                | 74.2  | 19            | 73.1   |
|                                                | <b>1</b>      | 5                 | 16.1  | 4             | 15.4   |
|                                                | <b>2</b>      | 3                 | 9.7   | 3             | 11.5   |
| <b>WM myelination delay</b>                    | <b>0</b>      | 22                | 71.0  | 22            | 84.6   |
|                                                | <b>1</b>      | 9                 | 29.0  | 4             | 15.4   |
| <b>WM volume reduction<sup>1</sup></b>         | <b>0</b>      | 24                | 77.4  | 18            | 72.0   |
|                                                | <b>1</b>      | 6                 | 19.4  | 3             | 12.0   |
|                                                | <b>2</b>      | 1                 | 3.2   | 3             | 12.0   |
|                                                | <b>3</b>      | 0                 | 0.0   | 1             | 4.0    |
| <b>Dilated ventricles<sup>1</sup></b>          | <b>0</b>      | 21                | 67.7  | 20            | 80.0   |
|                                                | <b>1</b>      | 5                 | 16.1  | 3             | 12.0   |
|                                                | <b>2</b>      | 5                 | 16.1  | 2             | 8.0    |
| <b>IVH</b>                                     | <b>0</b>      | 30                | 96.8  | 26            | 100.0  |
|                                                | <b>1</b>      | 1                 | 3.2   | 0             | 0.0    |
| <b>GM signal abnormality</b>                   | <b>0</b>      | 31                | 100.0 | 26            | 100.0  |
|                                                | <b>&gt; 0</b> | 0                 | 0.0   | 0             | 0.0    |
| <b>GM gyral maturation</b>                     | <b>0</b>      | 24                | 77.4  | 24            | 92.3   |
|                                                | <b>1</b>      | 6                 | 19.4  | 2             | 7.7    |
|                                                | <b>2</b>      | 1                 | 3.2   | 0             | 0.0    |
| <b>DGM signal abnormality</b>                  | <b>0</b>      | 30                | 96.8  | 26            | 100.00 |
|                                                | <b>1</b>      | 1                 | 3.2   | 0             | 0.00   |
| <b>DGM volume reduction<sup>1</sup></b>        | <b>0</b>      | 31                | 100.0 | 25            | 100.0  |
|                                                | <b>1</b>      | 0                 | 0.0   | 0             | 0.0    |
| <b>Increased extra-axial space<sup>1</sup></b> | <b>0</b>      | 23                | 74.2  | 25            | 100.0  |
|                                                | <b>1</b>      | 4                 | 12.9  | 0             | 0.0    |
|                                                | <b>2</b>      | 4                 | 12.9  | 0             | 0.0    |
| <b>CB signal abnormality</b>                   |               |                   |       |               |        |

|                                        |          |    |      |    |       |
|----------------------------------------|----------|----|------|----|-------|
|                                        | <b>0</b> | 29 | 93.6 | 26 | 100.0 |
|                                        | <b>1</b> | 2  | 6.5  | 0  | 0.0   |
| <b>CB volume reduction<sup>1</sup></b> |          |    |      |    |       |
|                                        | <b>0</b> | 24 | 77.4 | 16 | 64.0  |
|                                        | <b>1</b> | 6  | 19.4 | 8  | 32.0  |
|                                        | <b>2</b> | 1  | 3.2  | 1  | 4.0   |
| <b>Total WM score</b>                  |          |    |      |    |       |
|                                        | <b>0</b> | 9  | 29.0 | 13 | 50.0  |
|                                        | <b>1</b> | 7  | 22.6 | 2  | 7.7   |
|                                        | <b>2</b> | 9  | 29.0 | 5  | 19.2  |
|                                        | <b>3</b> | 6  | 19.4 | 4  | 15.4  |
|                                        | <b>4</b> | 0  | 0.0  | 1  | 3.9   |
|                                        | <b>5</b> | 0  | 0.0  | 1  | 3.9   |
| <b>Total DGM Score</b>                 |          |    |      |    |       |
|                                        | <b>0</b> | 30 | 96.8 | 26 | 100.0 |
|                                        | <b>1</b> | 1  | 3.2  | 0  | 0.0   |
| <b>Total GM Score</b>                  |          |    |      |    |       |
|                                        | <b>0</b> | 20 | 64.5 | 24 | 92.3  |
|                                        | <b>1</b> | 5  | 16.1 | 2  | 7.7   |
|                                        | <b>2</b> | 3  | 9.7  | 0  | 0.0   |
|                                        | <b>3</b> | 3  | 9.7  | 0  | 0.0   |
| <b>Total CB Score</b>                  |          |    |      |    |       |
|                                        | <b>0</b> | 23 | 74.2 | 17 | 65.4  |
|                                        | <b>1</b> | 7  | 22.6 | 8  | 30.8  |
|                                        | <b>2</b> | 0  | 0.0  | 1  | 3.9   |
|                                        | <b>3</b> | 1  | 3.2  | 0  | 0.0   |
| <b>Global Abnormality Score</b>        |          |    |      |    |       |
|                                        | <b>0</b> | 5  | 16.1 | 11 | 42.3  |
|                                        | <b>1</b> | 6  | 19.4 | 3  | 11.5  |
|                                        | <b>2</b> | 8  | 25.8 | 3  | 11.5  |
|                                        | <b>3</b> | 5  | 16.1 | 5  | 19.2  |
|                                        | <b>4</b> | 2  | 6.5  | 0  | 0.0   |
|                                        | <b>5</b> | 2  | 6.5  | 3  | 11.5  |
|                                        | <b>6</b> | 2  | 6.5  | 1  | 3.9   |
|                                        | <b>8</b> | 1  | 3.2  | 0  | 0.0   |

<sup>1</sup> Metric-based data missing for 1 POM infant, percentages calculated for total number of infants for whom data were available

CB – cerebellum; DGM – deep grey matter; GM – cortical grey matter; IVH – intraventricular hemorrhage; POM – pomegranate; WM – white matter

**S5 Table.** Brain injury scores by study arm – per protocol (PP) analysis.

|                                                | Score      | Placebo Metabolite –ve<br>(n=17) |       | POM Metabolite +ve<br>(n=17) |       |
|------------------------------------------------|------------|----------------------------------|-------|------------------------------|-------|
|                                                |            | n                                | %     | n                            | %     |
| <b>WM cystic lesions</b>                       | <b>0</b>   | 17                               | 100.0 | 17                           | 100.0 |
|                                                | <b>≥ 1</b> | 0                                | 0.0   | 0                            | 0.0   |
| <b>WM focal signal abnormality</b>             | <b>0</b>   | 12                               | 70.6  | 15                           | 88.2  |
|                                                | <b>1</b>   | 3                                | 17.7  | 1                            | 5.9   |
|                                                | <b>2</b>   | 2                                | 11.8  | 1                            | 5.9   |
| <b>WM myelination delay</b>                    | <b>0</b>   | 12                               | 70.6  | 16                           | 94.1  |
|                                                | <b>1</b>   | 5                                | 29.4  | 1                            | 5.9   |
| <b>WM volume reduction<sup>1</sup></b>         | <b>0</b>   | 14                               | 82.4  | 12                           | 75.0  |
|                                                | <b>1</b>   | 3                                | 17.7  | 1                            | 6.3   |
|                                                | <b>2</b>   | 0                                | 0.0   | 3                            | 18.8  |
|                                                | <b>3</b>   | 0                                | 0.0   | 0                            | 0.00  |
| <b>Dilated ventricles<sup>1</sup></b>          | <b>0</b>   | 10                               | 58.8  | 15                           | 93.8  |
|                                                | <b>1</b>   | 5                                | 29.4  | 1                            | 6.3   |
|                                                | <b>2</b>   | 2                                | 11.8  | 0                            | 0.0   |
| <b>IVH</b>                                     | <b>0</b>   | 16                               | 94.1  | 17                           | 100.0 |
|                                                | <b>1</b>   | 1                                | 5.9   | 0                            | 0.0   |
| <b>GM signal abnormality</b>                   | <b>0</b>   | 17                               | 100.0 | 17                           | 100.0 |
|                                                | <b>≥ 1</b> | 0                                | 0.0   | 0                            | 0.0   |
| <b>GM gyral maturation</b>                     | <b>0</b>   | 12                               | 70.6  | 17                           | 100.0 |
|                                                | <b>1</b>   | 4                                | 23.5  | 0                            | 0.0   |
|                                                | <b>2</b>   | 1                                | 5.9   | 0                            | 0.0   |
| <b>DGM signal abnormality</b>                  | <b>0</b>   | 16                               | 94.1  | 17                           | 100.0 |
|                                                | <b>1</b>   | 1                                | 5.9   | 0                            | 0.0   |
| <b>DGM volume reduction<sup>1</sup></b>        | <b>0</b>   | 17                               | 100.0 | 16                           | 100.0 |
|                                                | <b>1</b>   | 0                                | 0.0   | 0                            | 0.0   |
| <b>Increased extra-axial space<sup>1</sup></b> | <b>0</b>   | 12                               | 70.6  | 16                           | 100.0 |
|                                                | <b>1</b>   | 1                                | 5.9   | 0                            | 0.0   |
|                                                | <b>2</b>   | 4                                | 23.5  | 0                            | 0.0   |
| <b>CB signal abnormality</b>                   | <b>0</b>   | 16                               | 94.1  | 17                           | 100.0 |



|                                        |          |    |      |    |       |
|----------------------------------------|----------|----|------|----|-------|
|                                        | <b>1</b> | 1  | 5.9  | 0  | 0.0   |
| <b>CB volume reduction<sup>1</sup></b> | <b>0</b> | 11 | 64.7 | 10 | 62.5  |
|                                        | <b>1</b> | 5  | 29.4 | 5  | 31.3  |
|                                        | <b>2</b> | 1  | 5.9  | 1  | 6.3   |
| <b>Total WM Score</b>                  | <b>0</b> | 3  | 17.7 | 11 | 64.7  |
|                                        | <b>1</b> | 6  | 35.3 | 2  | 11.8  |
|                                        | <b>2</b> | 6  | 35.3 | 2  | 11.8  |
|                                        | <b>3</b> | 2  | 11.8 | 2  | 11.8  |
|                                        | <b>4</b> | 0  | 0.0  | 0  | 0.0   |
|                                        | <b>5</b> | 0  | 0.0  | 0  | 0.0   |
| <b>Total DGM Score</b>                 | <b>0</b> | 16 | 94.1 | 17 | 100.0 |
|                                        | <b>1</b> | 1  | 5.9  | 0  | 0.0   |
| <b>Total GM Score</b>                  | <b>0</b> | 10 | 58.8 | 17 | 100.0 |
|                                        | <b>1</b> | 2  | 11.8 | 0  | 0.0   |
|                                        | <b>2</b> | 2  | 11.8 | 0  | 0.0   |
|                                        | <b>3</b> | 3  | 17.7 | 0  | 0.0   |
| <b>Total CB Score</b>                  | <b>0</b> | 11 | 64.7 | 11 | 64.7  |
|                                        | <b>1</b> | 5  | 29.4 | 5  | 29.4  |
|                                        | <b>2</b> | 0  | 0.0  | 1  | 5.9   |
|                                        | <b>3</b> | 1  | 5.9  | 0  | 0.0   |
| <b>Global Abnormality Score</b>        | <b>0</b> | 0  | 0.0  | 9  | 52.9  |
|                                        | <b>1</b> | 6  | 35.3 | 3  | 17.7  |
|                                        | <b>2</b> | 4  | 23.5 | 1  | 5.9   |
|                                        | <b>3</b> | 2  | 11.8 | 3  | 17.7  |
|                                        | <b>4</b> | 1  | 5.9  | 0  | 0.0   |
|                                        | <b>5</b> | 1  | 5.9  | 1  | 5.9   |
|                                        | <b>6</b> | 2  | 11.8 | 0  | 0.0   |
|                                        | <b>8</b> | 1  | 5.9  | 0  | 0.0   |

<sup>1</sup> Metric-based data missing for 1 POM infant, percentages calculated for total number of infants for whom data were available

CB – cerebellum; DGM – deep grey matter; GM – cortical grey matter; IVH – intraventricular hemorrhage; POM – pomegranate; WM – white matter

**S6 Table.** Brain injury scores by study arm – per protocol (PP) analysis, excluding infants

born to mothers who were metabolite positive at enrollment

|                                                | Score      | Placebo Metabolite –ve<br><i>n</i> =16 |       | POM Metabolite +ve<br><i>n</i> =9 |       |
|------------------------------------------------|------------|----------------------------------------|-------|-----------------------------------|-------|
|                                                |            | <i>n</i>                               | %     | <i>n</i>                          | %     |
| <b>WM cystic lesions</b>                       | <b>0</b>   | 16                                     | 100.0 | 9                                 | 100.0 |
|                                                | <b>≥ 1</b> | 0                                      | 0.0   | 0                                 | 0.0   |
| <b>WM focal signal abnormality</b>             | <b>0</b>   | 12                                     | 75.0  | 9                                 | 100.0 |
|                                                | <b>1</b>   | 2                                      | 12.5  | 0                                 | 0.0   |
|                                                | <b>2</b>   | 2                                      | 12.5  | 0                                 | 0.0   |
| <b>WM myelination delay</b>                    | <b>0</b>   | 12                                     | 75.0  | 8                                 | 88.9  |
|                                                | <b>1</b>   | 4                                      | 25.0  | 1                                 | 11.1  |
| <b>WM volume reduction<sup>1</sup></b>         | <b>0</b>   | 13                                     | 81.3  | 6                                 | 75.0  |
|                                                | <b>1</b>   | 3                                      | 18.8  | 1                                 | 12.5  |
|                                                | <b>2</b>   | 0                                      | 0.0   | 1                                 | 12.5  |
|                                                | <b>3</b>   | 0                                      | 0.0   | 0                                 | 0.0   |
| <b>Dilated ventricles<sup>1</sup></b>          | <b>0</b>   | 9                                      | 56.3  | 8                                 | 100.0 |
|                                                | <b>1</b>   | 5                                      | 31.3  | 0                                 | 0.0   |
|                                                | <b>2</b>   | 2                                      | 12.5  | 0                                 | 0.0   |
| <b>IVH</b>                                     | <b>0</b>   | 15                                     | 93.8  | 9                                 | 100.0 |
|                                                | <b>1</b>   | 1                                      | 6.3   | 0                                 | 0.0   |
| <b>GM signal abnormality</b>                   | <b>0</b>   | 16                                     | 100.0 | 9                                 | 100.0 |
|                                                | <b>≥ 1</b> | 0                                      | 0.0   | 0                                 | 0.0   |
| <b>GM gyral maturation</b>                     | <b>0</b>   | 11                                     | 68.8  | 9                                 | 100.0 |
|                                                | <b>1</b>   | 4                                      | 25.0  | 0                                 | 0.0   |
|                                                | <b>2</b>   | 1                                      | 6.3   | 0                                 | 0.0   |
| <b>Increased extra-axial space<sup>1</sup></b> | <b>0</b>   | 11                                     | 68.8  | 8                                 | 100.0 |
|                                                | <b>1</b>   | 1                                      | 6.3   | 0                                 | 0.0   |
|                                                | <b>2</b>   | 4                                      | 25.0  | 0                                 | 0.0   |
| <b>DGM signal abnormality</b>                  | <b>0</b>   | 15                                     | 93.8  | 9                                 | 100.0 |
|                                                | <b>1</b>   | 1                                      | 6.3   | 0                                 | 0.0   |
| <b>DGM volume reduction<sup>1</sup></b>        | <b>0</b>   | 16                                     | 100.0 | 8                                 | 100.0 |
|                                                | <b>1</b>   | 0                                      | 0.0   | 0                                 | 0.0   |

|                                        |          |    |      |   |       |
|----------------------------------------|----------|----|------|---|-------|
| <b>CB signal abnormality</b>           | <b>0</b> | 15 | 93.8 | 9 | 100.0 |
|                                        | <b>1</b> | 1  | 6.3  | 0 | 0.0   |
| <b>CB volume reduction<sup>1</sup></b> | <b>0</b> | 10 | 62.5 | 5 | 62.5  |
|                                        | <b>1</b> | 5  | 31.3 | 2 | 25    |
|                                        | <b>2</b> | 1  | 6.3  | 1 | 12.5  |
| <b>Total WM Score</b>                  | <b>0</b> | 3  | 18.8 | 7 | 77.8  |
|                                        | <b>1</b> | 6  | 37.5 | 1 | 11.1  |
|                                        | <b>2</b> | 5  | 31.3 | 0 | 0.0   |
|                                        | <b>3</b> | 2  | 12.5 | 1 | 11.1  |
|                                        | <b>4</b> | 0  | 0.0  | 0 | 0.0   |
|                                        | <b>5</b> | 0  | 0.0  | 0 | 0.0   |
| <b>Total DGM Score</b>                 | <b>0</b> | 15 | 93.8 | 9 | 100.0 |
|                                        | <b>1</b> | 1  | 6.3  | 0 | 0.0   |
| <b>Total GM Score</b>                  | <b>0</b> | 9  | 56.3 | 9 | 100.0 |
|                                        | <b>1</b> | 2  | 12.5 | 0 | 0.0   |
|                                        | <b>2</b> | 2  | 12.5 | 0 | 0.0   |
|                                        | <b>3</b> | 3  | 18.8 | 0 | 0.0   |
| <b>Total CB Score</b>                  | <b>0</b> | 10 | 62.5 | 6 | 66.7  |
|                                        | <b>1</b> | 5  | 31.3 | 2 | 22.2  |
|                                        | <b>2</b> | 0  | 0.0  | 1 | 11.1  |
|                                        | <b>3</b> | 1  | 6.3  | 0 | 0.0   |
| <b>Global Abnormality Score</b>        | <b>0</b> | 0  | 0.0  | 6 | 66.7  |
|                                        | <b>1</b> | 6  | 37.5 | 1 | 11.1  |
|                                        | <b>2</b> | 3  | 18.8 | 1 | 11.1  |
|                                        | <b>3</b> | 2  | 12.5 | 0 | 0.0   |
|                                        | <b>4</b> | 1  | 6.3  | 0 | 0.0   |
|                                        | <b>5</b> | 1  | 6.3  | 1 | 11.1  |
|                                        | <b>6</b> | 2  | 12.5 | 0 | 0.0   |
|                                        | <b>8</b> | 1  | 6.3  | 0 | 0.0   |

<sup>1</sup> Metric-based data missing for 1 POM infant, percentages calculated for total number of infants for whom data were available

CB – cerebellum; DGM – deep grey matter; GM – cortical grey matter; IVH – intraventricular hemorrhage; POM – pomegranate; WM – white matter

**S7 Table.** Brain injury and study arm, stratified by obesity status for infants with increased extra-axial space in modified intent-to-treat (mITT) analysis, and dilated ventricles in per protocol (PP) analysis

| <b>mITT – Juice association with extra-axial space, by obesity status<sup>1</sup></b> |                                      |                      |                               |                      |
|---------------------------------------------------------------------------------------|--------------------------------------|----------------------|-------------------------------|----------------------|
|                                                                                       | <b>POM (<i>n</i>=25)<sup>2</sup></b> |                      | <b>Placebo (<i>n</i>=31)</b>  |                      |
|                                                                                       | <b>Obese</b>                         | <b>Non-Obese</b>     | <b>Obese</b>                  | <b>Non-Obese</b>     |
|                                                                                       | <b>(<i>n</i>=6)</b>                  | <b>(<i>n</i>=19)</b> | <b>(<i>n</i>=16)</b>          | <b>(<i>n</i>=15)</b> |
| Increased extra-axial space, <i>n</i> (%)                                             | 0 (0)                                | 0 (0)                | 6 (37.5)                      | 2 (13.3)             |
| <b>PP – Juice association with enlarged ventricles, by obesity status<sup>1</sup></b> |                                      |                      |                               |                      |
|                                                                                       | <b>POM Metabolite +ve</b>            |                      | <b>Placebo Metabolite –ve</b> |                      |
|                                                                                       | <b>(<i>n</i>=16)<sup>2</sup></b>     |                      | <b>(<i>n</i>=17)</b>          |                      |
|                                                                                       | <b>Obese</b>                         | <b>Non-obese</b>     | <b>Obese</b>                  | <b>Non-obese</b>     |
|                                                                                       | <b>(<i>n</i>=4)</b>                  | <b>(<i>n</i>=12)</b> | <b>(<i>n</i>=10)</b>          | <b>(<i>n</i>=7)</b>  |
| Dilated ventricles, <i>n</i> (%)                                                      | 1 (25)                               | 0 (0)                | 6 (60)                        | 1 (14.3)             |

<sup>1</sup> Percentages shown are for infants with injury only, stratified by obesity status (cutoff, BMI > 30)

<sup>2</sup> Metric-based data missing for 1 POM infant, percentages calculated for total number of infants for whom data were available
